# Supplementary material for: Using Transcription Modules to Identify Expression Clusters Perturbed in Williams-Beuren Syndrome
Source: PLoS Comput Biol. 2011 Jan 20;7(1):e1001054. doi: 10.1371/journal.pcbi.1001054 (PMC3024257; doi:10.1371/journal.pcbi.1001054)
Supplement: Table S1 — Cell line information. (0.02 MB XLS) [file pcbi.1001054.s003.xls]

## Sheet: Sheet1
Cell line ID	Age at biopsy (years)	Gender	Genotype
F055	4	F	WBS
D890	3	F	WBS
F223	4	F	WBS
F348	3	F	WBS
10590	3	F	WBS
H652	7	F	WBS
10358	7	F	WBS
4319	8	F	WBS
1104	3	F	Control
2433	5	F	Control
5042	8	F	Control
5290	7	F	Control
5850	3	F	Control
6089	4	F	Control
8495	5	F	Control
9118	5	F	Control
9837	3	F	Control
