# Supplementary material for: Using Transcription Modules to Identify Expression Clusters Perturbed in Williams-Beuren Syndrome
Source: PLoS Comput Biol. 2011 Jan 20;7(1):e1001054. doi: 10.1371/journal.pcbi.1001054 (PMC3024257; doi:10.1371/journal.pcbi.1001054)
Supplement: Table S3 — Differential expression of the WBS hemizygous and flanking genes. (0.02 MB XLS) [file pcbi.1001054.s005.xls]

## Sheet: Sheet1
Gene symbol	WBS type	Affymetrix probe id	Raw p-value	BH-adjusted p-value	Log fold change	Outcome	Number of modules
GBAS	flanking	201816_s_at	0.0342608	0.155336	0.289211	non-significantly upregulated	1+1
PSPH	flanking	205194_at	-0.00418846	-0.0463799	-0.70489	significantly downregulated	4+1
ZFD25/ZNF107	flanking	NA	NA	NA	NA	not tested, not expressed	2+8
VKORC1L1	flanking	224881_at	0.495931	0.709444	0.0655765	non-significantly upregulated	NA+NA
GUSB	flanking	202605_at	0.00945466	0.0740131	0.538735	non-significantly upregulated	0+0
ASL	flanking	204608_at	-0.485999	-0.702547	-0.220519	non-significantly downregulated	0+0
RCP9/CRCP	flanking	203899_s_at	0.104803	0.296935	0.177814	non-significantly upregulated	6+16
TPST1	flanking	204140_at	-0.000523754	-0.0154811	-1.02679	significantly downregulated	25+21
KCTD7	flanking	213474_at	-0.0791649	-0.252762	-0.242122	non-significantly downregulated	NA+3
RABGEF1	flanking	218310_at	0.215775	0.448836	0.14198	non-significantly upregulated	9+7
NM_017994/C7orf42	flanking	224688_at	-0.398323	-0.6335	-0.0989472	non-significantly downregulated	0+0
RASFD1	flanking	NA	NA	NA	NA	not on array	NA+NA
AUTS2	flanking	212599_at	-0.277717	-0.517052	-0.270843	non-significantly downregulated	26+13
WBSCR17	flanking	NA	NA	NA	NA	not tested, not expressed	NA+NA
CALN1	flanking	NA	NA	NA	NA	not tested, not expressed	NA+NA
WBSCR20C/NSUN5P2	LCR	NA	NA	NA	NA	not on array	NA+NA
TRIM74	LCR	NA	NA	NA	NA	not tested, not expressed	NA+NA
WBSCR20A/NSUN5	LCR	213773_x_at	-5.84021e-05	-0.00498822	-0.746372	significantly downregulated	0+0
TRIM50	LCR	NA	NA	NA	NA	not tested, not expressed	NA+NA
FKBP6	WBS	NA	NA	NA	NA	not tested, not expressed	NA+NA
FZD9	WBS	NA	NA	NA	NA	not tested, not expressed	NA+NA
BAZ1B	WBS	208445_s_at	-0.000109564	-0.00695225	-1.07256	significantly downregulated	0+10
BCL7B	WBS	202518_at	-0.00500047	-0.0510658	-0.922046	non-significantly downregulated	3+11
TBL2	WBS	212685_s_at	-0.000261233	-0.0106979	-0.952572	significantly downregulated	0+9
WBSCR14/MLXIPL	WBS	NA	NA	NA	NA	not tested, not expressed	NA+NA
WBSCR24/VPS37D	WBS	NA	NA	NA	NA	not tested, not expressed	NA+NA
WBSCR18/DNAJC30	WBS	223367_at	-0.00208497	-0.0315586	-0.981864	significantly downregulated	NA+NA
WBSCR22	WBS	207628_s_at	-0.000169728	-0.00874122	-0.810402	significantly downregulated	3+5
STX1A	WBS	NA	NA	NA	NA	not tested, not expressed	4+6
WBSCR21/ABHD11	WBS	NA	NA	NA	NA	not tested, not expressed	4+3
CLDN3	WBS	NA	NA	NA	NA	not tested, not expressed	NA+NA
CLDN4	WBS	NA	NA	NA	NA	not tested, not expressed	NA+NA
WBSCR27	WBS	NA	NA	NA	NA	not tested, not expressed	NA+NA
WBSCR28	WBS	NA	NA	NA	NA	not tested, not expressed	NA+NA
ELN	WBS	212670_at	-9.47723e-05	-0.00650187	-2.95724	significantly downregulated	22+9
LIMK1	WBS	NA	NA	NA	NA	not tested, not expressed	11+9
EIF4H	WBS	206621_s_at	-0.000463045	-0.014565	-0.873584	significantly downregulated	0+12
WBSCR5/LAT2	WBS	211768_at	0.982121	0.993457	0.00158411	non-significantly upregulated	21+10
RFC2	WBS	1053_at	-0.121522	-0.323224	-0.319141	non-significantly downregulated	21+26
CYLN2/CLIP2	WBS	211031_s_at	-0.054852	-0.204987	-0.478514	non-significantly downregulated	31+19
GTF2IRD1	WBS	218412_s_at	-0.829217	-0.918159	-0.0434204	non-significantly downregulated	0+0
GTF2I	WBS	210891_s_at	-0.000170563	-0.00875994	-0.503026	significantly downregulated	42+23
WBSCR16	WBS	221247_s_at	0.136704	0.345372	0.121527	non-significantly upregulated	0+0
TRIM73	LCR	1554250_s_at	0.490659	0.705241	0.178346	non-significantly upregulated	NA+NA
WBSCR20B/NSUN5P1	LCR	NA	NA	NA	NA	not on array	NA+NA
HIP1	flanking	205425_at	0.00155251	0.0269061	0.669817	significantly upregulated	17+8
RHBDL7/RHBDD2	flanking	232053_x_at	-0.0362086	-0.159941	-0.431044	non-significantly downregulated	NA+NA
POR	flanking	208928_at	-0.349155	-0.590159	-0.0796088	non-significantly downregulated	22+22
MKSTYX/STYXL1	flanking	232353_s_at	0.245405	0.482364	0.181788	non-significantly upregulated	0+1
MDH2	flanking	213333_at	0.0108859	0.0796502	0.354258	non-significantly upregulated	0+0
DTX2	flanking	NA	NA	NA	NA	not tested, not expressed	2+1
FGL2	flanking	227265_at	-0.222971	-0.457458	-1.26246	non-significantly downregulated	10+6
MAGI2	flanking	209737_at	0.0134022	0.0897885	0.774565	non-significantly upregulated	46+51
CACNA2D1	flanking	NA	NA	NA	NA	not tested, not expressed	14+6
GRM3	flanking	NA	NA	NA	NA	not tested, not expressed	NA+NA
