# Supplementary material for: Using Transcription Modules to Identify Expression Clusters Perturbed in Williams-Beuren Syndrome
Source: PLoS Comput Biol. 2011 Jan 20;7(1):e1001054. doi: 10.1371/journal.pcbi.1001054 (PMC3024257; doi:10.1371/journal.pcbi.1001054)
Supplement: Table S7 — Dysregulated modules, M2. (0.03 MB XLS) [file pcbi.1001054.s009.xls]

## Sheet: S7-M2-modules-summary
Module	Gene and sample thresholds	Genes	Samples	Number of WBS samples	Top enriched GO BP category	Top GO BP p-value	Top enriched GO CC category	Top GO CC p-value	Top enriched GO MF category	Top GO MF p-value	Top enriched KEGG pathway	Top KEGG p-value
40	4, 1.8	13	6	5
54	4, 1.6	12	5	5
80	4, 1.2	12	18	7
119	3.8, 1.8	17	5	5			extracellular region	0.0201097
192	3.6, 2	27	5	0			extracellular region	0.00788345
284	3.4, 2	41	5	5			extracellular region	0.00570133
323	3.4, 1.6	32	8	6			extracellular region	0.00767258
328	3.4, 1.6	12	14	1
379	3.4, 1	16	29	4
410	3.2, 2	60	5	5	retinoic acid metabolic process	0.0435372	extracellular region	0.011112
500	3.2, 1	41	20	7			extracellular region	0.0135107
503	3.2, 1	73	28	0	inflammatory response	5.34405e-07	extracellular region	1.42626e-11	cytokine activity	2.65051e-08	Cytokine-cytokine receptor interaction	0.000751366
607	2.8, 2	103	6	6			extracellular region	0.0130061
702	2.6, 2	163	5	5			MHC class I peptide loading complex	0.000427165
711	2.6, 2	155	6	6			extracellular region	0.00328578
741	2.6, 1.8	159	8	5	multicellular organismal development	0.00873006	extracellular region	0.000862628
770	2.6, 1.4	149	9	7			intrinsic to membrane	0.00109553
806	2.4, 2	239	5	5	antigen processing and presentation of peptide antigen	0.0435372	intrinsic to membrane	2.0879e-05
809	2.4, 2	191	5	3	antigen processing and presentation of peptide antigen	0.0216676	extracellular region	0.000191932
827	2.4, 1.8	226	7	6			MHC class I peptide loading complex	0.00119073
852	2.4, 1.6	165	11	3	activation of plasma proteins during acute inflammatory response	0.0475732
877	2.2, 2	339	6	6			MHC class I peptide loading complex	0.00292791
991	2, 1.6	373	12	6	immune response	0.00235851	extracellular region	1.77717e-12	interleukin-1 receptor activity	0.00274166
