# Supplementary material for: Using Transcription Modules to Identify Expression Clusters Perturbed in Williams-Beuren Syndrome
Source: PLoS Comput Biol. 2011 Jan 20;7(1):e1001054. doi: 10.1371/journal.pcbi.1001054 (PMC3024257; doi:10.1371/journal.pcbi.1001054)
Supplement: Table S10 — GO/KEGG term enrichment among genes common to both sets of dysregulated modules. (0.04 MB XLS) [file pcbi.1001054.s012.xls]

## Sheet: Biological Process
GO ID	BH-adjusted p-value	Odds ratio	Expected count	Count	Category size	GO term
GO:0032501	0.000243416	1.99257	60.7509	98	1127	multicellular organismal process
GO:0006955	0.00165665	3.16864	9.64899	26	179	immune response
GO:0006959	0.00165665	13.0835	1.02419	8	19	humoral immune response
GO:0006954	0.00225023	4.21225	4.90535	17	91	inflammatory response
GO:0007275	0.00306603	1.85856	49.2692	78	914	multicellular organismal development
GO:0002376	0.00306603	2.43518	16.9801	36	315	immune system process
GO:0006952	0.00306603	3.10644	8.6248	23	160	defense response
GO:0045087	0.00596952	6.22455	2.10229	10	39	innate immune response
GO:0009611	0.00700456	3.04381	7.97794	21	148	response to wounding
GO:0002541	0.013733	17.8289	0.53905	5	10	activation of plasma proteins during acute inflammatory response
GO:0006956	0.013733	17.8289	0.53905	5	10	complement activation
GO:0007218	0.0167554	10.7232	0.86248	6	16	neuropeptide signaling pathway

## Sheet: Cellular Component
GO ID	BH-adjusted p-value	Odds ratio	Expected count	Count	Category size	GO term
GO:0005576	2.36671e-13	3.66998	24.2717	68	431	extracellular region
GO:0044421	1.07734e-08	3.84175	13.0087	40	231	extracellular region part
GO:0031012	1.60956e-05	4.3091	6.30726	22	112	extracellular matrix
GO:0005578	1.98539e-05	4.34546	5.96937	21	106	proteinaceous extracellular matrix
GO:0005615	6.34696e-05	3.65048	7.54619	23	134	extracellular space

## Sheet: Molecular Function
GO ID	BH-adjusted p-value	Odds ratio	Expected count	Count	Category size	GO term
GO:0004888	0.00135419	3.35716	8.41812	24	161	transmembrane receptor activity
GO:0005230	0.00597155	73.4332	0.261432	4	5	extracellular ligand-gated ion channel activity
GO:0004866	0.00597155	6.43136	1.83003	9	35	endopeptidase inhibitor activity
GO:0030414	0.00597155	6.43136	1.83003	9	35	protease inhibitor activity
GO:0005102	0.00597155	2.37573	14.7448	31	282	receptor binding
GO:0004908	0.0120189	Inf	0.156859	3	3	interleukin-1 receptor activity
GO:0030246	0.0120189	3.49576	4.6535	14	89	carbohydrate binding
GO:0005125	0.0120189	5.92686	1.72545	8	33	cytokine activity
GO:0008009	0.0120189	24.4691	0.366005	4	7	chemokine activity
GO:0042379	0.0120189	24.4691	0.366005	4	7	chemokine receptor binding
GO:0001871	0.0121078	5.06081	2.19603	9	42	pattern binding
GO:0015276	0.0140488	11.4971	0.679724	5	13	ligand-gated ion channel activity
GO:0022834	0.0140488	11.4971	0.679724	5	13	ligand-gated channel activity
GO:0004872	0.0180721	2.09769	15.8428	30	303	receptor activity
GO:0005231	0.0180721	54.8961	0.209146	3	4	excitatory extracellular ligand-gated ion channel activity
GO:0019966	0.0180721	54.8961	0.209146	3	4	interleukin-1 binding
GO:0005539	0.0236288	4.77462	2.03917	8	39	glycosaminoglycan binding
GO:0030247	0.0266508	4.62459	2.09146	8	40	polysaccharide binding
GO:0008083	0.0307818	3.63885	3.18948	10	61	growth factor activity
GO:0016620	0.031797	12.228	0.522865	4	10	oxidoreductase activity, acting on the aldehyde or oxo group of donors, NAD or NADP as acceptor
GO:0004871	0.034659	1.7489	26.3524	42	504	signal transducer activity
GO:0060089	0.034659	1.7489	26.3524	42	504	molecular transducer activity
GO:0004896	0.0425686	7.06888	0.941157	5	18	cytokine receptor activity

## Sheet: KEGG
KEGG ID	BH-adjusted p-value	Odds ratio	Expected count	Count	Category size	Pathway
4060	0.0147492	4.33846	3.51515	12	62	Cytokine-cytokine receptor interaction
4610	0.0479079	6.96364	1.19062	6	21	Complement and coagulation cascades
